# Supplementary material for: Implantable Ventricular Assist Device Use and Outcomes in People With End‐Stage Renal Disease
Source: PubMed Central journal article supplement — J Am Heart Assoc. 2018 Jul 6;7(14):e008664. doi: 10.1161/JAHA.118.008664 (PMC6064848; doi:10.1161/jaha.118.008664), 2018-07-06

# SUPPLEMENTAL MATERIAL

**Table S1:** ICD-9-CM codes used for VAD indication classification, and for comorbidities.

| <b>VAD Indication Classification</b> | <b>ICD-9-CM codes</b>                                                                                                                                      |
|--------------------------------------|------------------------------------------------------------------------------------------------------------------------------------------------------------|
| Primary therapy                      | Heart failure: 428.x, 402.x1, 404.x1, 404.x3<br>Cardiogenic shock: 785.51                                                                                  |
| Post-cardiotomy                      | 36.1x, 35.11-35.14, 35.21-35.28, 37.11, 37.62, 37.65                                                                                                       |
| <b>Comorbidities</b>                 |                                                                                                                                                            |
| Diabetes                             | 249.x, 250.x, 357.2, 362.0x                                                                                                                                |
| Atrial fibrillation/flutter          | 427.3x                                                                                                                                                     |
| Valvular heart disease               | 394.x-397.1, 424.x, 746.3-746.6, v42.2, v43.3                                                                                                              |
| Coronary disease                     | 36.0x-36.39, 410.x, 411.x, 412, 413.x, 414.x, v45.81-v45.82                                                                                                |
| Ventricular fibrillation             | 427.1, 427.4x                                                                                                                                              |
| Cerebrovascular disease              | 430, 431, 432.x 433.x, 434.x, 435.x, 436, 437.x, 438.x                                                                                                     |
| Peripheral vascular disease          | 38.03, 38.05, 38.06, 38.08, 38.10, 38.44, 39.22, 39.23, 39.24, 39.25, 39.26, 39.29, 39.71, 440.2x, 440.3x, 440.4, 440.8, 440.9, 441.x, 443.x, 445.x, 557.x |
| Hypertension                         | 401.x-405.x                                                                                                                                                |
| Chronic pulmonary disease            | 490.x-496.x, 500-505, 506.4, 516, 516.0, 516.1, 516.2, 516.3, 516.8, 516.9                                                                                 |
| Cancer                               | 140.x-165.x, 170.x-172.x, 174.x, 175.x, 180.x-209.x, 238.6, 273.3                                                                                          |
| Liver disease                        | 070.x, 456.0, 456.1, 456.1, 456.2x, 570-573.x, v42.7                                                                                                       |
| Depression                           | 296.2x, 296.3x, 296.5x, 296.82, 300.4, 311                                                                                                                 |

**Table S2.** ICD-9-CM codes to identify infection related hospitalizations.

0031, 0362, 0380, 03810, 03811, 03812, 03819, 0382, 0383, 03840, 03841, 03842, 03843, 03844, 03849, 0388, 0389, 04082, 0545, 1125, 78552, 7907, 7908, 99591, 99592

03282, 03640, 03641, 03642, 03643, 07420, 07421, 07422, 07423, 11281, 11503, 11504, 11593, 11594, 1303, 3910, 3911, 3912, 3918, 3919, 3920, 4210, 4211, 4219, 4220, 42292

00321, 0360, 0361, 0470, 0471, 0478, 0479, 048, 0490, 0491, 0498, 0499, 0530, 05310, 05314, 0543, 05472, 05474, 0550, 05600, 05601, 05609, 05821, 05829, 0621, 0622, 0623, 0625, 0628, 0629, 0638, 0639, 064, 06641, 06642, 0721, 0722, 11283, 1142, 11501, 11591, 1300, 3200, 3201, 3202, 3203, 3207, 32081, 32082, 32089, 3209, 3210, 3211, 3212, 3230, 32301, 32302, 3231, 3234, 32341, 32342, 3240, 3241, 3249

03283, 5670, 5671, 5672, 56721, 56722, 56723, 56729, 56789, 5679, 0030, 0038, 0039, 0040, 0041, 0043, 0048, 0049, 0050, 0051, 0052, 0053, 0054, 00581, 00589, 0059, 0071, 0074, 0075, 00800, 00801, 00802, 00803, 00804, 00809, 0081, 0082, 0083, 00841, 00842, 00843, 00844, 00845, 00846, 00847, 00849, 0085, 00861, 00862, 00863, 00864, 00865, 00866, 00867, 00869, 0088, 0090, 0091, 0092, 0093, 0392, 0700, 0701, 07043, 07053, 0723, 07271, 11285, 1305, 5400, 5401, 5409, 541, 542, 56201, 56203, 56211, 56213, 566, 56781, 5695, 5720, 5721, 5750, 57510

03284, 0720, 59010, 59011, 5902, 5903, 59080, 59081, 5909, 5950, 5954, 59589, 5959, 5970, 59800, 59801, 5990, 6010, 6012, 6013, 6014, 6019, 6031, 6040, 60490, 60491, 6071, 6072, 6080, 6084, 6140, 6142, 6143, 6145, 6150, 6159, 6163, 6164

00322, 01100, 01101, 01102, 01103, 01104, 01105, 01106, 01110, 01111, 01112, 01113, 01114, 01115, 01116, 01120, 01121, 01122, 01123, 01124, 01125, 01126, 01130, 01131, 01132, 01133, 01134, 01135, 01136, 01150, 01151, 01152, 01153, 01154, 01155, 01156, 01160, 01161, 01162, 01163, 01164, 01165, 01166, 01170, 01171, 01172, 01173, 01174, 01175, 01176, 01180, 01181, 01182, 01183, 01184, 01185, 01186, 01190, 01191, 01192, 01193, 01194, 01195, 01196, 0310, 0330, 0338, 0339, 0391, 0521, 0551, 0730, 0796, 1124, 1140, 1145, 11505, 11595, 1304, 1363, 4650, 4658, 4659, 4660, 46611, 46619, 4800, 4801, 4802, 4803, 4808, 4809, 481, 4820, 4821, 4822, 48230, 48231, 48232, 48239, 48240, 48241, 48242, 48249, 48281, 48282, 48283, 48284, 48289, 4829, 4830, 4831, 4838, 4841, 4843, 4846, 4847, 4848, 485, 486, 4870, 4871, 488, 4880, 4881, 490, 49122, 4941, 5100, 5109, 5111, 5130, 5131, 5192

0311, 03285, 0390, 0400, 37601, 6800, 6801, 6802, 6803, 6804, 6805, 6806, 6807, 6808, 6809, 68100, 68101, 68110, 68111, 6819, 6820, 6821, 6822, 6823, 6824, 6825, 6826, 6827, 6828, 6829, 684, 6850, 6868, 6869, 72886, 9101, 9103, 9109, 9111, 9113, 9119, 9121, 9123, 9129, 9131, 9133, 9139, 9141, 9143, 9149, 9151, 9153, 9159, 9161, 9163, 9169, 9171, 9173, 9179, 9191, 9193, 9199

00323, 00324, 03682, 37603, 05671, 71100, 71101, 71102, 71103, 71104, 71105, 71106, 71107, 71108, 71109, 71140, 71141, 71142, 71143, 71144, 71145, 71146,

71147, 71148, 71149, 71150, 71151, 71152, 71153, 71154, 71155, 71156, 71157, 71158, 71159, 71160, 71161, 71162, 71163, 71164, 71165, 71166, 71167, 71168, 71169, 71180, 71181, 71182, 71183, 71184, 71185, 71186, 71187, 71188, 71189, 71190, 71191, 71192, 71193, 71194, 71195, 71196, 71197, 71198, 71199, 73000, 73001, 73002, 73003, 73004, 73005, 73006, 73007, 73008, 73009, 73020, 73021, 73022, 73023, 73024, 73025, 73026, 73027, 73028, 73029, 73080, 73081, 73082, 73083, 73084, 73085, 73086, 73087, 73088, 73089, 73090, 73091, 73092, 73093, 73094, 73095, 73096, 73097, 73098, 73099

99662, 99931, 99668

53086, 53641, 56961, 99660, 99661, 99663, 99664, 99665, 99666, 99667, 99669, 99731, 99802, 99851, 99859, 9993, 99939

Dalrymple LS, Mu Y, Romano PS, Nguyen DV, Chertow GM, Delgado C, et al. Outcomes of infection-related hospitalization in Medicare beneficiaries receiving in-center hemodialysis. *Am J Kidney Dis.* 2015;65(5):754-62.

**Table S3. Subdistribution hazard models for people with ESRD on dialysis at time of VAD implantation, with transplantation as a competing event.**

| Variables                     | Hazard Ratios (95% Confidence Intervals) |                   |
|-------------------------------|------------------------------------------|-------------------|
|                               | Univariate                               | Multivariate      |
| Age (per 1 year)              | 1.01 (0.99, 1.03)                        | 1.01 (0.99, 1.03) |
| Race                          |                                          |                   |
| Other                         | 1 (ref)                                  | 1 (ref)           |
| Black                         | 0.65 (0.37, 1.13)                        | 0.84 (0.47, 1.51) |
| Sex                           |                                          |                   |
| Female                        | 1 (ref)                                  | 1 (ref)           |
| Male                          | 0.53 (0.28, 1.02)                        | 0.46 (0.24, 0.85) |
| Cause of ESRD                 |                                          |                   |
| Other                         | 1 (ref)                                  | 1 (ref)           |
| Diabetes                      | 1.53 (0.88, 2.64)                        | 1.33 (0.77, 2.29) |
| VAD implantation year         |                                          |                   |
| 2006-2009                     | 1 (ref)                                  | 1 (ref)           |
| 2010-2011                     | 0.85 (0.44, 1.66)                        | 0.89 (0.47, 1.68) |
| 2012-2014                     | 0.60 (0.31, 1.17)                        | 0.59 (0.31, 1.14) |
| VAD implantation circumstance |                                          |                   |
| Primary                       | 1 (ref)                                  | 1 (ref)           |
| Post-cardiotomy               | 1.96 (1.13, 3.37)                        | 1.73 (0.95, 3.16) |

**Figure S1. Cumulative incidence of mortality stratified by primary versus post-cardiotomy VAD implantation**

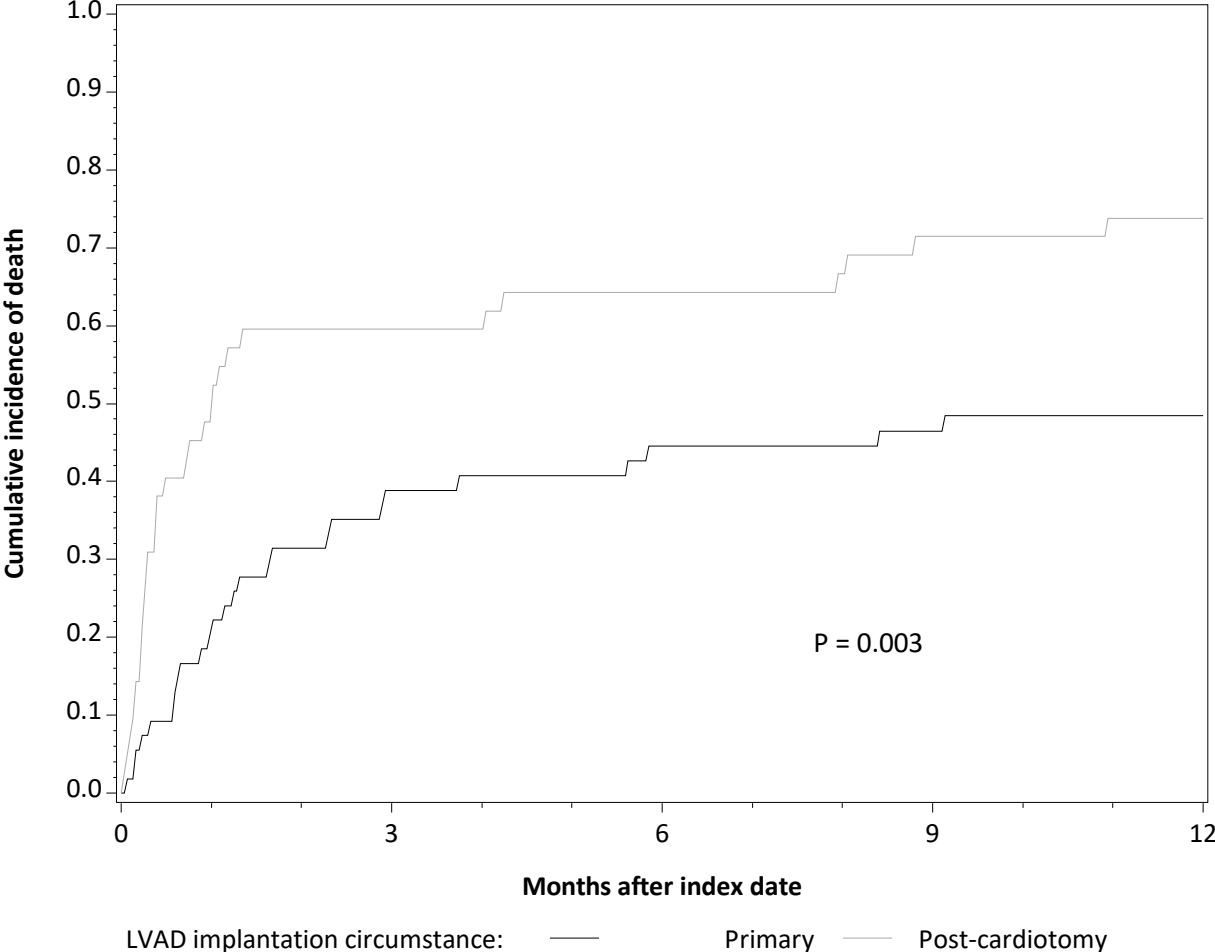

Supplement: JAH3-7-e008664-s001.pdf [file JAH3-7-e008664-s001.pdf]
